1    **Deep learning accurately predicts estrogen receptor status in breast**  
2                                    **cancer metabolomics data**

3    Fadhil M Alakwaa<sup>1</sup>, Kumardeep Chaudhary<sup>1</sup>, Lana X Garmire<sup>1,2\*</sup>

4    <sup>1</sup>Epidemiology Program, University of Hawaii Cancer Center, Honolulu, HI 96813, USA.

5    <sup>2</sup>Molecular Biosciences and Bioengineering Graduate Program, University of Hawaii at Manoa,

6    Honolulu, HI 96822, USA.

7    \*To whom the correspondence should be addressed:

8    Lana X Garmire, PhD

9    Associate Professor

10   Email address: [lgarmire@cc.hawaii.edu](mailto:lgarmire@cc.hawaii.edu)

11   Phone: +1 (808) 441-8193

12

13

14

15

16 **ABSTRACT**

17 Metabolomics holds the promise as a new technology to diagnose highly heterogeneous diseases.  
18 Conventionally, metabolomics data analysis for diagnosis is done using various statistical and machine  
19 learning based classification methods. However, it remains unknown if deep neural network, a class of  
20 increasingly popular machine learning methods, is suitable to classify metabolomics data. Here we use a  
21 cohort of 271 breast cancer tissues, 204 positive estrogen receptor (ER+) and 67 negative estrogen receptor  
22 (ER-), to test the accuracies of autoencoder, a deep learning (DL) framework, as well as six widely used  
23 machine learning models, namely Random Forest (RF), Support Vector Machines (SVM), Recursive  
24 Partitioning and Regression Trees (RPART), Linear Discriminant Analysis (LDA), Prediction Analysis for  
25 Microarrays (PAM), and Generalized Boosted Models (GBM). DL framework has the highest area under  
26 the curve (AUC) of 0.93 in classifying ER+/ER- patients, compared to the other six machine learning  
27 algorithms. Furthermore, the biological interpretation of the first hidden layer reveals eight commonly  
28 enriched significant metabolomics pathways (adjusted P-value<0.05) that cannot be discovered by other  
29 machine learning methods. Among them, protein digestion & absorption and ATP-binding cassette (ABC)  
30 transporters pathways are also confirmed in integrated analysis between metabolomics and gene expression  
31 data in these samples. In summary, deep learning method shows advantages for metabolomics based breast  
32 cancer ER status classification, with both the highest prediction accuracy (AUC=0.93) and better revelation  
33 of disease biology. We encourage the adoption of autoencoder based deep learning method in the  
34 metabolomics research community for classification.

35 **KEYWORDS:** Breast cancer, metabolomics, estrogen receptor, deep learning, bioinformatics

36

37

38

39

## 40 **Introduction**

41 According to Global Health Estimates (WHO 2013), more than half million women died due of breast  
42 cancer worldwide<sup>1</sup>. Breast cancer is the second leading cause of cancer-related deaths among women in the  
43 United States<sup>2</sup>. Based on human epidermal growth factor receptor 2 (Her2), progesteron receptor (PR) and  
44 estrogen receptor (ER), breast cancer can be categorized into four molecular subtypes<sup>3</sup>: Luminal A (ER+,  
45 PR+/- and Her2-), Luminal B (ER+, PR+/- and Her2+/-), Her2-enriched (ER-, PR- and Her2+), and triple  
46 negative (ER-, PR- and Her2)<sup>4</sup>. The survival outcomes differ significantly among these subtypes. Luminal  
47 A and B subtypes have a relatively good prognosis, however triple negative tumors and Her2 tumors have  
48 very poor prognosis<sup>5</sup>. Identification of molecular subtypes is crucial in determining cancer prognosis and  
49 therapeutic selection. Recently, many studies used metabolomics data to segregate molecular subtypes,  
50 given that breast cancer is manifested as a metabolic disease<sup>6, 7</sup>. For example, glutamate-to-glutamine ratio  
51 and aerobic glycolysis were proposed as biomarkers of ER and Her2 status, respectively<sup>8, 9</sup>.

52 Metabolomics studies are usually done by three major platforms: gas chromatography-mass spectrometry  
53 (GC-MS), liquid chromatography (LC-MS), and nuclear magnetic resonance (NMR). The parallel use of  
54 these instruments allows detecting more metabolites for the same sample. Coupling with the development  
55 in the instrumentations, state-of-the-art data analysis tools are much needed to handle the large amount of  
56 metabolite data generated. For problems of metabolomics data classification and regression, machine  
57 learning algorithms have been applied<sup>10</sup>. For example, Random Forest (RF) is a widely used machine  
58 learning algorithm based on decision tree theory. It works with high-dimensional data and can deal with  
59 unbalanced and missing values in the data<sup>11</sup>. Support Vector Machine (SVM) is another machine learning  
60 algorithm that separates the metabolites data with N data points into (N-1) dimensional hyperplane<sup>12</sup>. SVM  
61 was used to classify healthy and pneumonia patients based on nuclear magnetic resonance (NMR)  
62 metabolomics data<sup>12</sup>.

63 DL or deep neural network, is a new class of machine learning methods that have been successfully applied  
64 to various areas of genomics research<sup>13, 14</sup>, including predicting the intrinsic molecular subtypes of breast  
65 cancer<sup>15</sup>, inferring expression profiles of genes<sup>16</sup> and predicting the functional activity of genomic  
66 sequence<sup>17</sup>. In a recent study, denoising autoencoder (DAs), a type of DL algorithm, was applied to gene  
67 expression data of the breast cancer<sup>15</sup>. It successfully extracted features that stratify normal/tumor samples,  
68 ER+/ER- status, and intrinsic molecular subtypes. In another study based on gene expression data, DL  
69 outperformed linear regression in inference of the expression of target genes from the expression of  
70 landmark genes<sup>16</sup>. Moreover, an open source conventional neural networks (CNNs) package "Basset" was  
71 developed to learn the functional activity of 164 cell types DNA sequences from genomics data, and to  
72 annotate the non-coding genome<sup>17</sup>. Compared to the flourishing applications of DL in genomics, it remains  
73 unknown if deep neural network is suitable to classify metabolomics data, esp. when the samples are of  
74 medium size (i.e. several hundred).

75 Here we applied feed-forward networks, a type of DL framework, as an alternative to the machine learning  
76 methods such as those listed earlier, to classify metabolomics data. We examined the predictive accuracy  
77 of the DL and other machine learning algorithms to predict ER status from a public metabolomics dataset<sup>18</sup>.  
78 We demonstrated this DL method performs better than a wide cluster of machine learning methods,  
79 including Random Forest (RF), Support Vector Machines (SVM), Recursive Partitioning and Regression  
80 Trees (RPART), Linear Discriminant Analysis (LDA), Prediction Analysis for Microarrays (PAM), and  
81 Generalized Boosted Models (GBM). Furthermore, the biological interpretation of the hidden layers reveals  
82 eight breast cancer related pathways such as central carbon metabolism in cancer and glutathione  
83 metabolism. Moreover, we further analyzed the extracted features from our DL model, by mapping the  
84 biosynthetic enzymes involved in the metabolomics pathways.

## 85 **Materials and Methods**

### 86 **Data set**

87 The metabolomics data used in this study consists of 271 breast cancer samples (204 ER+ and 67 ER-)  
88 collected from a biobank at the Pathology Department of Charité Hospital, Berlin, Germany<sup>18</sup>.  
89 Metabolomics profiles of these BC patients can be downloaded from the supporting material of this study<sup>19</sup>.  
90 A total of 162 metabolites with known chemical structure were measured using gas chromatography  
91 followed by time of flight mass spectroscopy (GC-TOFMS) for all tissues samples. A detailed description  
92 of the protocols and the platforms used in this study were described in <sup>18</sup>. For validation, we downloaded  
93 gene expression dataset GSE59198<sup>20</sup> from the Gene Expression Omnibus (GEO) database, which is  
94 composed of 154 samples, a subset of the 271 samples. In this data set, the gene expression profiles of BC  
95 tumor tissues (122 ER+ and 32 ER-) were analyzed using the cDNA-mediated Annealing, Selection,  
96 Extension and Ligation (DASL) assay. A total of 15,927 genes were detected ( $p < 0.01$ ) in at least 10% of  
97 the samples after applying spline normalization. Data can be downloaded from GEO repository  
98 <http://www.ncbi.nlm.nih.gov/geo>.

## 99 **Data Preprocessing**

100 We used K-Nearest Neighbors (KNN) method to impute missing metabolomics data<sup>21</sup>. To adjust for the  
101 offset between high and low-intensity features, and to reduce the heteroscedasticity, the logged value of  
102 each metabolite was centered by its mean ( $\bar{x}$ ) and autoscaled by its standard deviation ( $s$ ) as described in  
103 Equation 1<sup>22</sup>. We used quantile normalization to reduce sample-to-sample variation<sup>23</sup>.

$$104 \quad \hat{x}_{ij} = \left( \frac{\log_2(x_{ij}) - \bar{x}_i}{s} \right) \quad (1)$$

## 105 **Deep Learning**

106 DL refers to deep neural network framework, which is widely applied in pattern recognition, image  
107 processing, computer vision, and recently in bioinformatics<sup>13, 24, 25</sup>. Similar to other feed-forward artificial  
108 neural networks (ANNs), DL employs more than one hidden layer ( $y$ ) that connects the input ( $x$ ) and output  
109 layer ( $z$ ) via a weight ( $W$ ) matrix as shown in equation (2). Here we use sigmoid function as the transitioning  
110 function.

$$111 \quad y = \text{sigmoid}(Wx + b) \quad (2)$$

112 Activation value of the hidden layer ( $y$ ) can be calculated by sigmoid of the multiplication of the input  
113 sample  $x$  with the weight matrix  $W$  and bias  $b$ . The transpose of the weight matrix  $W$  and the bias  $b$  can  
114 then be used to construct the output ( $z$ ) layer, as described in equation (3).

$$115 \quad z = \text{sigmoid}(W'y + b') \quad (3)$$

116 The best set of the weight matrix  $W$  and bias  $b$  are expected to minimize the difference between the input  
117 layer ( $x$ ) and the output layer ( $z$ ). The objective function is called cross-entropy in equation (4) below, in  
118 which the optimal parameters are obtained by stochastic gradient descent searching.

$$119 \quad L_H(x, z) = -\sum_{k=1}^d [x_k \log z_k + (1 - x_k) \log(1 - z_k)] \quad (4)$$

120 To train the model, we first supplied sample input ( $x$ ) to the first layer and obtained the best parameters ( $W$ ,  
121  $b$ ) and the activation of the first hidden layer ( $y$ ), and then used  $y$  to learn the second layer. We repeated  
122 this process in subsequent layers, updating the weights and bias in each epoch. We then used back-  
123 propagation to tune the parameters of all layers. Finally, we fed the output of the last hidden layer to a  
124 softmax classifier which assigned new labels to the samples<sup>26</sup>. We used *h2o* R package to tune the  
125 parameters of the DL model<sup>27</sup>.

### 126 **Other machine learning algorithms**

127 We selected a representative set of six machine-learning algorithms that are highly recommended by the  
128 metabolomics community and applied widely in the literature reports: Random Forest (RF), Support Vector  
129 Machines (SVM), Recursive Partitioning and Regression Trees (RPART), Linear Discriminant Analysis  
130 (LDA), Prediction Analysis for Microarrays (PAM), and Generalized Boosted Models (GBM). To get the  
131 optimal predictions, we used the *caret* R package<sup>28</sup> to tune the parameters in the models.

### 132 **Modeling and evaluation**

133 We randomly split metabolomics samples into 80% training set and 20% testing set. The 80/20 split is a  
134 common practice of splitting ratio for samples of a moderate size in the machine learning applications. We  
135 chose this ratio in order to having enough training samples to build a good model and sufficient testing  
136 samples to evaluate the model. We performed 10-fold cross-validation on the 80% training data during the  
137 model construction process, and tested the model on the hold out 20% of data. We used *pROC* R package<sup>29</sup>

138 to compute area under the curve (AUC) of a receiver-operating characteristic (ROC) curve to assess the  
139 overall performance of the models. To avoid sampling bias, we repeated the above splitting process ten  
140 times and calculated the average AUC on the hold out 10 test samples. To control overfitting, we used two  
141 regularization parameters: L1, which increases model stability and causes many weights to become 0 and  
142 L2, which prevents weights enlargement.

143 We tuned DL model and other machine learning algorithms, on the following parameters: DL model:  
144 Epochs (number of passes of the full training set),  $l1$  (penalty to converge many weights to 0) and  $l2$  (penalty  
145 to prevent weights enlargement), and input dropout ratio (ratio of ignored neurons in the input layer during  
146 training), number of hidden layers; RPART model: complexity parameters (cost of adding node to the tree);  
147 GBM model: number of trees and interaction depths; SVM model: cost of classification; RF model: number  
148 of trees to fit; PAM model: threshold amount by for each of the class's centroid shrinking towards the all  
149 classes' centroid.

#### 150 **Feature importance**

151 Features importance was estimated based on model based approach<sup>28</sup>. In other words, a feature is  
152 considered important if it contributes to the model performance<sup>30</sup>. We used the variable importance  
153 functions `varimp` in *h2o* and `varImp` in *caret* R packages, to evaluate the top 20 features.

#### 154 **Identifiers standardization and differentially expressed genes**

155 We used the PubChem Identifier exchange service<sup>31</sup> to convert metabolites into their corresponding KEGG  
156 compound IDs; we then used KEGG API<sup>32</sup> to get the compound pathways and enzyme IDs. We used *limma*  
157 R package<sup>33</sup> to find enzymes with high fold changes as well as significant adjusted p-values between ER+  
158 and ER- samples.

#### 159 **Metabolomics enzymes network reconstruction and visualization**

160 We used MetaScape<sup>34</sup> v3.1.3, a Cytoscape plug-in to generate gene-metabolite network which integrates  
161 reaction and pathway information from KEGG and Edinburgh human metabolic network (EHMN)  
162 databases. To build enzyme-metabolite network, we selected a pathway based network from Metsacpe

163 analysis options. The input of this step were two files. The first file included the compound KEGG IDs, p-  
164 value and the fold change values of the top 20 metabolites extracted from the DL model. The second file  
165 included the enzyme KEGG IDs, p-value and the fold change values of the 898 genes whose expression  
166 values were statistically significantly different between ER- and ER+ samples.

### 167 **Metabolites enzymes correlation**

168 We calculated the correlations between the intensity levels of the metabolites and enzymes using  
169 Spearman's Correlation Coefficient in R. We plot the Circos plot of the strongest correlation using Circlize  
170 R package v0.4.0.

### 171 **Joint significant pathway analysis**

172 To perform joint significant pathway analysis on metabolomics and gene expression data from the same  
173 samples, we considered a comprehensive list of pathways from Reactome, EHMN, and KEGG databases,  
174 using online web tool IMPaLA<sup>35</sup>, and calculated hypergeometric p-values of genes ( $P_G$ ) and metabolites  
175 ( $P_M$ ). The joint P-value ( $P_j$ ) between metabolites and genes for pathway  $i$  was calculated as  $P_{ji} = P_{Gi} P_{Mi}$ <sup>36</sup>.  
176 This value was adjusted to control for multiple testing with the False Discovery Rate method.

### 177 **Code availability**

178 We include all preprocessing and the learning steps of the DL method as an R script in the supplementary  
179 file 1.

## 180 **Results**

### 181 **Workflow of autoencoder based classification**

182 We aim to assess the predictive ability of the DL framework to separate breast cancer patients based on  
183 their ER status, using metabolomics data. Towards this goal, we implemented the workflow of DL  
184 framework as in **Figure 1**. We applied preprocessing steps (log transformation, centering, autoscaling, and  
185 quantile normalization) before constructing the DL model, as recommended by others<sup>18,22</sup>. Before training  
186 the model, we pre-trained the model using autoencoder and the whole data without labels. This step  
187 improves the model performance, avoids random initialization of the weights, and selects the best model



188 architecture<sup>37</sup>. Then we trained the DL model using a wide range of parameters and selected the best model  
189 with the minimum mean square error (see Materials and Methods).

### 190 **Performance of the autoencoder based deep learning classification**

191 We compared DL with six other machine-learning methods commonly used in the community: Random  
192 Forest (RF), Support Vector Machines (SVM), Recursive Partitioning and Regression Trees (RPART),  
193 Linear Discriminant Analysis (LDA), Prediction Analysis for Microarrays (PAM), and Generalized  
194 Boosted Models (GBM). To assess the predictive power of the models, we partitioned the data into 80%  
195 training and 20% testing subsets. We performed 10-fold cross-validation on the 80% training data, and  
196 tested the model on the hold out 20% of data. To avoid sampling bias, we performed 10 independent  
197 splitting of training and testing subsets. We reported the averaged AUCs calculated on the hold out test  
198 sets. As shown in **Figure 2A**, the average AUC of DL yields the best AUC of 0.93, compared to other six  
199 classification methods. The superiority of DL accuracy is statistically significant (Wilcoxon signed-rank  
200 test  $P < 0.05$ ) than other methods, except RF and GBM. LDA and RPAT had the worst accuracy, likely due  
201 to their sensitivity to overfitting and unfit to the non-linear problems<sup>38</sup>.

202 DL as other machine learning algorithm needs more samples to achieve high accuracy<sup>39</sup>. To assess the  
203 effect of sample size on various models, we randomly removed  $\frac{1}{4}$ ,  $\frac{1}{2}$ , and  $\frac{3}{4}$  of the data sets (**Figure S1**).  
204 As expected, decreasing in sample size decreases the averaged AUCs of all classification methods in  
205 general except LDA on  $\frac{1}{4}$  samples, due to overfitting. Notably, the reduction of average AUC in DL is most  
206 pronounced among all methods, from the full to  $\frac{3}{4}$  data set (**Figure S1**). While DL loses the best average  
207 AUC status when the sample size is around 255, GBM, SVM and RF have the highest AUC for small  
208 sample sizes of 203, 136 and 68, respectively. Similarly, we also experimented the effect of metabolite size  
209 on various models (**Figure S2**). We randomly removed  $\frac{1}{8}$ ,  $\frac{1}{4}$ , and  $\frac{1}{2}$  of the 162 metabolites. Even with  
210 reduced numbers of metabolites, deep learning and the robust machine learning method SVM still have  
211 fairly good predictions, compared to other algorithms tested. This suggests that, due to colinearity, much

212 of information still exist in the remaining metabolites. Together, the drop-out experiments (**Figures S1 and**  
213 **S2**) demonstrate that DL method is sensitive to sample size, but much less sensitive to metabolite size.

#### 214 **Important features from DL**

215 To relate the importance of metabolites to ER status directly, we ranked the metabolites extracted from DL  
216 model based on their functional contributions to the outputs. In this approach, features that provide unique  
217 information to the trained network are ranked more importantly than those giving redundant information<sup>40</sup>.  
218 We listed the top 20 metabolites from DL in Table S1, and presented their heatmap and boxplots in **Figure**  
219 **S3**. Note the choice of 20 metabolite is guided by the original study, in which 19 out of 162 metabolites  
220 were claimed to change significantly among training and validation samples<sup>19</sup>. The original author divided  
221 the 271 samples into two parts, the training (2/3) and the validation (1/3) set. Among the training set, 65  
222 metabolites were different in ER- and ER+ and only 19 metabolites were validated in the validation set.

223 Among the 20 features, the top five features are beta-alanine, xanthine, isoleucine, glutamate, and taurine.  
224 These five metabolites have been either proposed as breast cancer biomarkers or associated with breast  
225 cancers in the original metabolomics report<sup>19</sup> and/or other studies<sup>6, 8, 41-43</sup>. For instance, Budczies et al. <sup>19</sup>  
226 found that beta-alanine had the most significant and largest fold changes between ER-(n=67) and ER+  
227 (n=204) tumor tissues. In another study, Glutamate was suggested as markers to segregate ER- from ER+  
228 in the training (n=186) as well as validation dataset (n=88)<sup>8</sup>. Glutamate to glutamine ratio (GGR) was  
229 significantly increased in the ER- tumors as compared to ER+. Overall survival analyses suggested GGR  
230 as a positive prognostic marker for BC<sup>8</sup>. In another study, Fan et al. classified BC plasma samples into  
231 subtypes i.e. ER+ vs ER- and HER2+ vs HER2-, based on a training set (n=51) and another test set (n=45)<sup>6</sup>.  
232 They found isoleucine had significant differential level between ER+ (lower) and ER- (higher) samples.  
233 Similarly, a study among female breast cancer patients (n=50) suggested serum taurine as an early marker,  
234 where its level was significantly lower than the normal (n=20) and high risk samples (n=15)<sup>42</sup>. In a cell line  
235 based study, xanthine was suggested as potential biomarker of breast cancer metastasis<sup>43</sup>, as it had the

236 highest variable influence on projection (VIP) in the three pair-wise comparisons among MCF-7/MCF-  
237 10A, MDA-MB-231/MCF-10A and MDA-MB-231/MCF-7<sup>43</sup>.

238 Further, we compared DL top 20 features with the same number of top features from all other methods in  
239 a bipartite graph (**Figure 2B**). Twelve metabolites are shared between DL and one or more algorithms.  
240 Among them, 1 (xanthine) is shared by six methods, 2 ( glyceric acid and citrulline) are shared by five  
241 methods, 4 (glutamine, taurine, glutamine acid, and beta-alanine) are shared by four methods, 1 (2-  
242 aminoadipic acid) is shared by three methods, 2 (nicotinamide acid and trehalose) are shared by two  
243 methods, and two (linoleic acid and hypoxanthine) are shared by one method (Table S1). Additionally, DL  
244 has identified 8 unique metabolites: isoleucine, putrescine, glycerol, 5'-deoxy-5'-methylthioadenosine,  
245 ornithine, tocopherol beta, phenylalanine, and arachidonic acid,

#### 246 **The biological relevance of the hidden layers**

247 To understand the high performance of the DL model, we probed into the hidden layer and analyzed the 25  
248 activation nodes from the first hidden layer. Among the top 12 nodes with the variances  $> 0.1$ , node 8, 22  
249 and 25 are significantly correlated with the samples' ER- status ( $P=1.14e-12$ ), whereas all other top 9 nodes  
250 are associated with the ER+ status (**Figure 3A**). These results confirm that the nodes in DL have significant  
251 biological meaning.

252 We identified a total of 129 metabolites which contribute most to the activation values of the top 12 nodes.  
253 Their relationships between the 129 metabolites and 12 nodes are shown in **Figure S4**. We define that  
254 metabolite  $x$  contributes to the activation value ( $y$ ) of node  $n$ , if the absolute value of the weight connecting  
255 metabolite  $x$  and node  $n$  is greater than 0.1. Beta-alanine and xanthine are the most common metabolites  
256 from all top 12 nodes. Among nodes 8, 22, and 25 which are highly correlated with ER- (**Figure 3A**), four  
257 common metabolites are shared: inositol, glutamate, xanthine, and uracil. Xanthine was among the panel  
258 of prognostic markers of breast cancer metastasis based on the metabolic profiling of the three breast cancer  
259 cell lines<sup>43</sup>. Glutamate have been reported as biomarkers to segregate ER- from ER+ in the training as well

260 as validation dataset, as described earlier<sup>8</sup>. Inositol phosphate metabolism pathway was previously reported  
261 to be associated with breast cancer, but not between ER+ and ER- cancers<sup>44</sup>. Uracil is, however, a potential  
262 new marker for ER- breast cancer that was not reported previously, according to our knowledge.

263 To link the metabolites in **Figure S4** with biological functions, we conducted pathways enrichment analysis  
264 using online web tool IMPALA<sup>35</sup>. The pathways are taken from Reactome, EHMN, and KEGG databases.  
265 Eight significant breast cancer related pathways (Figure 3B) are enriched in all nodes: protein digestion and  
266 absorption, central carbon metabolism in cancer, neuroactive ligand receptor interaction, ABC transporters,  
267 mineral absorption, inositol phosphate metabolism, glutathione metabolism, and cysteine and methionine  
268 metabolism. Albeit the name of “Neuroactive ligand-receptor interaction”, this pathway is significantly  
269 enriched (q-value=0.001) and it was shown changed in breast cancer cell lines<sup>45</sup> and naked mole rat<sup>46</sup>.  
270 Aspartate, glucine, taurine and glutamate are metabolites associated with this pathway in the metabolic  
271 dataset. Another interesting pathway with the name “mineral absorption” also shows significance (q-  
272 value=7.51E-06), attributed by five metabolites tryptophan, alanine, glycine, phosphoric acid, glutamine.  
273 All these five metabolites were found related with breast cancer previously<sup>47-49</sup>.

#### 274 **Integration of DL metabolites and enzymes**

275 We further aimed to validate the important metabolite features of DL model, by integrating metabolomics  
276 and gene expression data from the same patients. Towards this, we first conducted a joint pathway analysis  
277 between 20 metabolites extracted from DL model and 898 significantly differentiated enzymes between  
278 ER+ and ER- samples, using IMPALA (Figure 4). Most of the top significant pathways are related to  
279 metabolism of amino acids or protein digestion and absorption. Two pathways remain significant in joint  
280 pathway analysis, by comparing to metabolomics based pathway analysis in Figure 3B: protein digestion  
281 & absorption and ABC transporters, with 6 and 9 metabolites over-represented respectively. Specifically,  
282 urea, inositol allo-, phosphoric acid, glucose, glutamine, Isoleucine, and glutathione are the associated  
283 metabolites in ABC transporters. For protein digestion, glutamine, lysine, isoleucine, and beta-alanine are  
284 associated metabolites. Some literature evidence shows that protein digestion and ABC transporters are

285 related to breast cancer. For example, humans have 49 members of the ATP-binding cassette (ABC)  
286 membrane proteins<sup>50</sup>. Several of them such as ABCB1 and ABCC1 have developed a resistance to drug  
287 “multidrug resistance” (MDR) in breast cancer, when they are over-expressed over a period of time<sup>51</sup>.

288 To gain insights at individual metabolite/enzyme level, we then calculated Spearman correlations between  
289 the intensity levels of the top 20 metabolites and enzymes whose gene expression levels are significantly  
290 different between ER+/ER- for the same patients<sup>20</sup>. The Circos plot in **Figure 5** shows the names of  
291 metabolomics and enzymes that have correlations ( $|r| > 0.35$ ). Impressively, beta-alanine, the top ranked  
292 metabolite in DL, is the single most connected metabolite, correlated to more than 100 significantly  
293 differentially expressed enzymes. Pathway analysis of these enzymes correlated with beta-alanine shows  
294 strikingly significant enrichment (adjusted p-value =  $3.84e-05$ ) with FOXM1 transcription factor network  
295 pathway. FOXM1 is highly expressed in ER- samples and with a correlation coefficient  $r=0.5$  with beta-  
296 alanine.

297 Complementary to the correlation based analysis, we also used Metscape (Cytoscape plug-in) for gene-  
298 metabolite network analysis, by combining the ER+/ER- metabolomics data<sup>18</sup> and gene expression (from  
299 GSE59198)<sup>20</sup> for the same patients. ABAT, the enzyme that catalyze beta-alanine to malonate  
300 semialdehyde (Figure 6B), is highly correlated with beta-alanine ( $r=-0.62$ , Figure 6A). To understand better  
301 the connection between beta-alanine and FOX genes family, we performed motif enrichment analysis for  
302 the enzymes interacted with beta-alanine in Figure 6B using PASTAA tool<sup>52</sup>. Interestingly, FOXO1 was  
303 one of most significant transcription factors ( $p= 5.89e-04$ ) that targeted the promoters regions of beta-  
304 alanine interacted enzymes.

305

## 306 **Discussion**

307 Metabolomics has become a new platform for biomarker discovery. Accompanying this technology, robust  
308 and accurate classification methods to predict sample labels are in critical need. Recently, DL methods have  
309 gained much attention in domains such as genomics and imaging analysis. However, there has not been any

310 systematic investigation of DL methods in the metabolomics space. In this report, we aimed to fill this void  
311 and assessed the performance of feed-forward network, a widely used DL framework, on classifying  
312 ER+/ER- breast cancer metabolomics data.

313 There are many advantages of DL over shallow machine learning algorithms, which are beyond the scope  
314 of this study. The conventional machine learning algorithms require engineering domain knowledge to  
315 create features from raw data, whereas DL automatically extracts simple features from the input data using  
316 general purpose learning procedure. These simple features are mapped into outputs using a complex  
317 architecture composed of a series of non-linear functions “hierarchical representations,” to maximize the  
318 predictive accuracy of the model optimally. By increasing number of layers and neurons per layers, robust  
319 features may be constructed, and error signals can be diminished as they pass through multiple layers<sup>13</sup>.  
320 Therefore, DL succeeds to construct high-level transformed features from input data, making it more  
321 desirable than shallow machine learning algorithms in this respect<sup>14</sup>.

322 We demonstrated that DL has a higher predictive accuracy over the other six popular machine learning  
323 methods, in detecting ER status from metabolomics data. DL exploits the idea that the higher “succeeding”  
324 layer is learned from the lower “preceding” layer and selects the essential metabolites from DL model.  
325 These metabolites are useful for the learning process and explain the high predictability of DL compared  
326 to conventional machine learning algorithms. DL extracted features that could be considered as novel  
327 biomarkers, such as uracil, which were not previously reported as breast cancer. Also, unlike other machine  
328 learning methods, DL method offers additional insights on eight KEGG pathway being significantly  
329 different due to ER status. All these new observations warrant further investigation.

330 An interesting new link we discover lies between FOXM1 family and beta-alanine. A recent study showed  
331 FOXM1 to be a major cause for resistance to various chemotherapeutics<sup>53</sup>, and reduction of FOXM1 levels  
332 induced apoptosis of breast cancer cells<sup>54</sup>. The motif enrichment analysis of the beta-alanine interacted  
333 enzymes indicates that the transcription factor FOXO1 targeted the promoter regions of these enzymes.  
334 Thus the relationships among beta-alanine, FOXM1 and FOXO1 is worth further investigation. In addition,  
335 we found many interesting involvement of DL unique metabolites in breast cancer diagnosis and treatment.

336 For example, phenylalanine is found significantly elevated in the advanced metastatic breast cancer<sup>55</sup> and  
337 linoleic acid has been used to lower the risk of breast cancer<sup>56</sup>. Also, Putrescine has been known to play a  
338 critical role in many metabolomics processes in breast cancer, such as apoptosis, and proliferation<sup>57</sup>. The  
339 knock-down experiments on ornithine decarboxylase (ODC), an enzyme which converts ornithine to  
340 putrescin, showed the growth inhibition in the ER $\alpha$ + MCF7 and T47D and ER $\alpha$ - MDA-MB-231 breast  
341 cancer cells<sup>58</sup>. Arachidonic acid was previously shown to be integral part of the new signaling for the cell  
342 migrations in the MDA-MB-231 breast cancer cells<sup>59</sup>.

343 Despite the outstanding performance of DL methods, one should be mindful of several caveats in its  
344 application in metabolomics research. DL is time-consuming computation (Table S2), relative to some other  
345 machine learning methods<sup>40</sup>. Also, metabolomics data sets are generally small, in comparison to imaging  
346 data. Thus very small data sets may not be suitable for DL. We experimented with the effects of reducing  
347 sample size and metabolite size on the seven methods in comparison, and found that DL is indeed sensitive  
348 to the sample size of the study. On the contrary, due to colinearity among metabolites, autoencoder has  
349 fairly robust predictions even when the number of metabolites are reduced. Another point of consideration  
350 is the reproducibility of the technology itself. A platform with better reproducibility is expected to yield  
351 biomarker models that predict more accurately in validation datasets (less overfitting). We thus speculate  
352 that DL models based on NMR metabolomics data (more metabolites and better reproducibility) will be  
353 more accurate than DL models based on LC-MS data, when other conditions are the same.

354 Lastly, in this report we compared the ML vs DL under the topic of classification of metabolomics data.  
355 The advantages of DL on other non-classification problems in metabolomics research are yet to be explored.  
356 For example, unsupervised machine learning algorithms such as PCA and hierarchical clustering were  
357 applied to the metabolomics data<sup>60</sup>, and our group is currently exploring using autoencoders for  
358 unsupervised learning in metabolomics data. As another example, we have also worked on prognosis  
359 prediction using shallow and deep neural network models in the genomics space<sup>61, 62</sup>. We successfully  
360 used autoencoder to integrate multiple omics datasets (RNA-Seq, microRNA-Seq and DNA methylation)

361 to predict patient survival robustly, exemplified by liver cancer [2]. Compared to genomics data,  
362 metabolomics data have higher multicollinearity and noise levels. Also the number of identifiable  
363 metabolites are lower than the identifiable genes in genomics assays. These issues pose potential challenges  
364 when extending genomics tools for metabolomics research. Nevertheless, it will be very interesting to test  
365 these DL and neural network models on appropriate metabolomics data sets alone, or in combination with  
366 coupled genomics data.

## 367 **Conclusions**

368 We show evidence that DL outperforms other machine learning algorithms for ER status classification in  
369 breast cancer metabolomics data. The biological interpretation of the hidden layer of the DL model also  
370 reveals eight significant breast cancer related pathways, which are not able to obtain from the other machine  
371 learning algorithms in comparison.

372

## 373 **Author Contributions**

374 LXG and FMA envisioned the project and designed the work. FMA coded the project and conducted the  
375 analysis. KC mapped metabolites and enzymes into KEGG pathway. FMA wrote the manuscript with help  
376 from LXG and KC. LXG, FMA and KC have read, revised and approved the final manuscript.

377

## 378 **Competing financial interests**

379 The author(s) declare no competing financial interests.

## 380 **Acknowledgements**

381 This research was supported by grants K01ES025434 awarded by NIEHS through funds provided by the  
382 trans-NIH Big Data to Knowledge (BD2K) initiative (<http://datascience.nih.gov/bd2k>), P20 COBRE  
383 GM103457 awarded by NIH/NIGMS, and R01 LM012373 awarded by NLM, R01 HD084633 awarded by



384 NICHD to LX Garmire. We thank all members in Garmire group for reviewing and commenting the  
385 manuscript.

386

## 387 **References**

- 388 (1) Organization, W. H. Breast cancer: prevention and control.  
389 <http://www.who.int/cancer/detection/breastcancer/en/index1.html> (October 10, 2017)
- 390 (2) Society, A. C. About Breast Cancer. [https://www.cancer.org/cancer/breast-](https://www.cancer.org/cancer/breast-cancer/about/how-common-is-breast-cancer.html)  
391 [cancer/about/how-common-is-breast-cancer.html](https://www.cancer.org/cancer/breast-cancer/about/how-common-is-breast-cancer.html) (September 21, 2017)
- 392 (3) Carey, L. A.; Perou, C. M.; Livasy, C. A.; Dressler, L. G.; Cowan, D.; Conway, K.;  
393 Karaca, G.; Troester, M. A.; Tse, C. K.; Edmiston, S.; Deming, S. L.; Geradts, J.; Cheang, M. C.;  
394 Nielsen, T. O.; Moorman, P. G.; Earp, H. S.; Millikan, R. C. Race, breast cancer subtypes, and  
395 survival in the Carolina Breast Cancer Study. *JAMA* **2006**, *295* (21), 2492-2502.
- 396 (4) O'Brien, K. M.; Cole, S. R.; Tse, C. K.; Perou, C. M.; Carey, L. A.; Foulkes, W. D.;  
397 Dressler, L. G.; Geradts, J.; Millikan, R. C. Intrinsic breast tumor subtypes, race, and long-term  
398 survival in the Carolina Breast Cancer Study. *Clin Cancer Res* **2010**, *16* (24), 6100-6110.
- 399 (5) Haque, R.; Ahmed, S. A.; Inzhakova, G.; Shi, J.; Avila, C.; Polikoff, J.; Bernstein, L.;  
400 Enger, S. M.; Press, M. F. Impact of breast cancer subtypes and treatment on survival: an  
401 analysis spanning two decades. *Cancer Epidemiol Biomarkers Prev* **2012**, *21* (10), 1848-1855.
- 402 (6) Fan, Y.; Zhou, X.; Xia, T. S.; Chen, Z.; Li, J.; Liu, Q.; Alolga, R. N.; Chen, Y.; Lai, M.  
403 D.; Li, P.; Zhu, W.; Qi, L. W. Human plasma metabolomics for identifying differential  
404 metabolites and predicting molecular subtypes of breast cancer. *Oncotarget* **2016**, *7* (9), 9925-  
405 9938.
- 406 (7) Tang, X.; Lin, C. C.; Spasojevic, I.; Iversen, E. S.; Chi, J. T.; Marks, J. R. A joint analysis  
407 of metabolomics and genetics of breast cancer. *Breast Cancer Res* **2014**, *16* (4), 415.
- 408 (8) Budczies, J.; Pfitzner, B. M.; Gyorffy, B.; Winzer, K. J.; Radke, C.; Dietel, M.; Fiehn, O.;  
409 Denkert, C. Glutamate enrichment as new diagnostic opportunity in breast cancer. *Int J Cancer*  
410 **2015**, *136* (7), 1619-1628.
- 411 (9) Lien, E. C.; Lyssiotis, C. A.; Juvekar, A.; Hu, H.; Asara, J. M.; Cantley, L. C.; Toker, A.  
412 Glutathione biosynthesis is a metabolic vulnerability in PI(3)K/Akt-driven breast cancer. *Nat*  
413 *Cell Biol* **2016**, *18* (5), 572-578.
- 414 (10) Truong, Y.; Lin, X.; Beecher, C. In *Learning a complex metabolomic dataset using*  
415 *random forests and support vector machines*, Proceedings of the tenth ACM SIGKDD  
416 international conference on Knowledge discovery and data mining, 2004; ACM: 2004; pp 835-  
417 840.
- 418 (11) Huang, J.-H.; Yan, J.; Wu, Q.-H.; Duarte Ferro, M.; Yi, L.-Z.; Lu, H.-M.; Xu, Q.-S.;  
419 Liang, Y.-Z. Selective of informative metabolites using random forests based on model  
420 population analysis. *Talanta* **2013**, *117* (Supplement C), 549-555.
- 421 (12) Mahadevan, S.; Shah, S. L.; Marrie, T. J.; Slupsky, C. M. Analysis of Metabolomic Data  
422 Using Support Vector Machines. *Analytical Chemistry* **2008**, *80* (19), 7562-7570.
- 423 (13) Min, S.; Lee, B.; Yoon, S. Deep learning in bioinformatics. *Brief Bioinform* **2016**.

- 424 (14) Angermueller, C.; Parnamaa, T.; Parts, L.; Stegle, O. Deep learning for computational  
425 biology. *Mol Syst Biol* **2016**, *12* (7), 878.
- 426 (15) Tan, J.; Ung, M.; Cheng, C.; Greene, C. S. Unsupervised feature construction and  
427 knowledge extraction from genome-wide assays of breast cancer with denoising autoencoders.  
428 *Pac Symp Biocomput* **2015**, 132-143.
- 429 (16) Chen, Y.; Li, Y.; Narayan, R.; Subramanian, A.; Xie, X. Gene expression inference with  
430 deep learning. *Bioinformatics* **2016**, *32* (12), 1832-1839.
- 431 (17) Kelley, D. R.; Snoek, J.; Rinn, J. L. Basset: learning the regulatory code of the accessible  
432 genome with deep convolutional neural networks. *Genome Res* **2016**, *26* (7), 990-999.
- 433 (18) Budczies, J.; Denkert, C.; Muller, B. M.; Brockmoller, S. F.; Klauschen, F.; Gyorffy, B.;  
434 Dietel, M.; Richter-Ehrenstein, C.; Marten, U.; Salek, R. M.; Griffin, J. L.; Hilvo, M.; Oresic,  
435 M.; Wohlgemuth, G.; Fiehn, O. Remodeling of central metabolism in invasive breast cancer  
436 compared to normal breast tissue - a GC-TOFMS based metabolomics study. *BMC Genomics*  
437 **2012**, *13*, 334.
- 438 (19) Budczies, J.; Brockmoller, S. F.; Muller, B. M.; Barupal, D. K.; Richter-Ehrenstein, C.;  
439 Kleine-Tebbe, A.; Griffin, J. L.; Oresic, M.; Dietel, M.; Denkert, C.; Fiehn, O. Comparative  
440 metabolomics of estrogen receptor positive and estrogen receptor negative breast cancer:  
441 alterations in glutamine and beta-alanine metabolism. *J Proteomics* **2013**, *94*, 279-288.
- 442 (20) Edgar, R.; Domrachev, M.; Lash, A. E. Gene Expression Omnibus: NCBI gene  
443 expression and hybridization array data repository. *Nucleic Acids Res* **2002**, *30* (1), 207-210.
- 444 (21) Shao, J. C. a. J. Nearest Neighbor Imputation for Survey Data. *Journal of Official*  
445 *Statistics* **2000**, *16* (2), 113-131.
- 446 (22) van den Berg, R. A.; Hoefsloot, H. C.; Westerhuis, J. A.; Smilde, A. K.; van der Werf, M.  
447 J. Centering, scaling, and transformations: improving the biological information content of  
448 metabolomics data. *BMC Genomics* **2006**, *7*, 142.
- 449 (23) Jauhiainen, A.; Madhu, B.; Narita, M.; Narita, M.; Griffiths, J.; Tavaré, S. Normalization  
450 of metabolomics data with applications to correlation maps. *Bioinformatics* **2014**, *30* (15), 2155-  
451 2161.
- 452 (24) Li, H. Deep learning for image denoising. *International Journal of Signal Processing,*  
453 *Image Processing and Pattern Recognition* **2014**, *7* (3), 171-180.
- 454 (25) LeCun, Y.; Kavukcuoglu, K.; Farabet, C. In *Convolutional networks and applications in*  
455 *vision*, Circuits and Systems (ISCAS), Proceedings of 2010 IEEE International Symposium on,  
456 2010; IEEE: 2010; pp 253-256.
- 457 (26) Lee, H. In *Tutorial on deep learning and applications*, NIPS 2010 Workshop on Deep  
458 Learning and Unsupervised Feature Learning, 2010; 2010.
- 459 (27) Candel, A.; Parmar, V.; LeDell, E.; Arora, A., Deep learning with h2o. In H2O: 2015.
- 460 (28) Kuhn, M. Caret package. *Journal of Statistical Software* **2008**, *28* (5), 1-26.
- 461 (29) Robin, X.; Turck, N.; Hainard, A.; Tiberti, N.; Lisacek, F.; Sanchez, J. C.; Muller, M.  
462 pROC: an open-source package for R and S+ to analyze and compare ROC curves. *BMC*  
463 *Bioinformatics* **2011**, *12*, 77.
- 464 (30) Gedeon, T. D. Data mining of inputs: analysing magnitude and functional measures.  
465 *International Journal of Neural Systems* **1997**, *8* (02), 209-218.
- 466 (31) Kim, S.; Thiessen, P. A.; Bolton, E. E.; Chen, J.; Fu, G.; Gindulyte, A.; Han, L.; He, J.;  
467 He, S.; Shoemaker, B. A.; Wang, J.; Yu, B.; Zhang, J.; Bryant, S. H. PubChem Substance and  
468 Compound databases. *Nucleic Acids Res* **2016**, *44* (D1), D1202-1213.

- 469 (32) Kanehisa, M.; Goto, S.; Sato, Y.; Furumichi, M.; Tanabe, M. KEGG for integration and  
470 interpretation of large-scale molecular data sets. *Nucleic Acids Res* **2012**, *40* (Database issue),  
471 D109-114.
- 472 (33) Smyth, G. K., Limma: linear models for microarray data. In *Bioinformatics and*  
473 *computational biology solutions using R and Bioconductor*, Springer: 2005; pp 397-420.
- 474 (34) Karnovsky, A.; Weymouth, T.; Hull, T.; Tarcea, V. G.; Scardoni, G.; Laudanna, C.;  
475 Sartor, M. A.; Stringer, K. A.; Jagadish, H. V.; Burant, C.; Athey, B.; Omenn, G. S. Metscape 2  
476 bioinformatics tool for the analysis and visualization of metabolomics and gene expression data.  
477 *Bioinformatics* **2012**, *28* (3), 373-380.
- 478 (35) Kamburov, A.; Cavill, R.; Ebbels, T. M.; Herwig, R.; Keun, H. C. Integrated pathway-  
479 level analysis of transcriptomics and metabolomics data with IMPaLA. *Bioinformatics* **2011**, *27*  
480 (20), 2917-2918.
- 481 (36) Cavill, R.; Kamburov, A.; Ellis, J. K.; Athersuch, T. J.; Blagrove, M. S.; Herwig, R.;  
482 Ebbels, T. M.; Keun, H. C. Consensus-phenotype integration of transcriptomic and metabolomic  
483 data implies a role for metabolism in the chemosensitivity of tumour cells. *PLoS Comput Biol*  
484 **2011**, *7* (3), e1001113.
- 485 (37) Pasa, L.; Sperduti, A. In *Pre-training of recurrent neural networks via linear*  
486 *autoencoders*, Advances in Neural Information Processing Systems, 2014; 2014; pp 3572-3580.
- 487 (38) Lee, C.; Nkounkou, B.; Huang, C. H. Comparison of LDA and SPRT on Clinical Dataset  
488 Classifications. *Biomed Inform Insights* **2011**, *4*, 1-7.
- 489 (39) Cho, J.; Lee, K.; Shin, E.; Choy, G.; Do, S. How much data is needed to train a medical  
490 image deep learning system to achieve necessary high accuracy? *arXiv preprint*  
491 *arXiv:1511.06348* **2015**.
- 492 (40) Goodfellow, I.; Bengio, Y.; Courville, A., *Deep learning*. MIT press: 2016.
- 493 (41) Fini, M. A.; Monks, J.; Farabaugh, S. M.; Wright, R. M. Contribution of xanthine  
494 oxidoreductase to mammary epithelial and breast cancer cell differentiation in part modulates  
495 inhibitor of differentiation-1. *Mol Cancer Res* **2011**, *9* (9), 1242-1254.
- 496 (42) El Agouza, I. M.; Eissa, S. S.; El Houseini, M. M.; El-Nashar, D. E.; Abd El Hameed, O.  
497 M. Taurine: a novel tumor marker for enhanced detection of breast cancer among female  
498 patients. *Angiogenesis* **2011**, *14* (3), 321-330.
- 499 (43) Kim, H. Y.; Lee, K. M.; Kim, S. H.; Kwon, Y. J.; Chun, Y. J.; Choi, H. K. Comparative  
500 metabolic and lipidomic profiling of human breast cancer cells with different metastatic  
501 potentials. *Oncotarget* **2016**, *7* (41), 67111-67128.
- 502 (44) Tan, J.; Yu, C. Y.; Wang, Z. H.; Chen, H. Y.; Guan, J.; Chen, Y. X.; Fang, J. Y. Genetic  
503 variants in the inositol phosphate metabolism pathway and risk of different types of cancer. *Sci*  
504 *Rep* **2015**, *5*, 8473.
- 505 (45) Huan, J.; Wang, L.; Xing, L.; Qin, X.; Feng, L.; Pan, X.; Zhu, L. Insights into significant  
506 pathways and gene interaction networks underlying breast cancer cell line MCF-7 treated with  
507 17 $\beta$ -Estradiol (E2). *Gene* **2014**, *533* (1), 346-355.
- 508 (46) Chen, Z. Y. a. Y. Z. a. L. In *in silico identification of novel cancer-related genes by*  
509 *comparative genomics of naked mole rat and rat*, 2012 IEEE 6th International Conference on  
510 Systems Biology (ISB), 2012; 2012; pp 285-290.
- 511 (47) Hensley, C. T.; Wasti, A. T.; DeBerardinis, R. J. Glutamine and cancer: cell biology,  
512 physiology, and clinical opportunities. *J Clin Invest* **2013**, *123* (9), 3678-3684.
- 513 (48) Amelio, I.; Cutruzzola, F.; Antonov, A.; Agostini, M.; Melino, G. Serine and glycine  
514 metabolism in cancer. *Trends Biochem Sci* **2014**, *39* (4), 191-198.

- 515 (49) Lyon, D. E.; Walter, J. M.; Starkweather, A. R.; Schubert, C. M.; McCain, N. L.  
516 Tryptophan degradation in women with breast cancer: a pilot study. *BMC Res Notes* **2011**, *4*,  
517 156.
- 518 (50) Sun, Y. L.; Patel, A.; Kumar, P.; Chen, Z. S. Role of ABC transporters in cancer  
519 chemotherapy. *Chin J Cancer* **2012**, *31* (2), 51-57.
- 520 (51) Liu, Y.; Peng, H.; Zhang, J. T. Expression profiling of ABC transporters in a drug-  
521 resistant breast cancer cell line using AmpArray. *Mol Pharmacol* **2005**, *68* (2), 430-438.
- 522 (52) Thomas-Chollier, M.; Hufton, A.; Heinig, M.; O'Keeffe, S.; Masri, N. E.; Roider, H. G.;  
523 Manke, T.; Vingron, M. Transcription factor binding predictions using TRAP for the analysis of  
524 ChIP-seq data and regulatory SNPs. *Nat Protoc* **2011**, *6* (12), 1860-1869.
- 525 (53) Park, Y. Y.; Jung, S. Y.; Jennings, N. B.; Rodriguez-Aguayo, C.; Peng, G.; Lee, S. R.;  
526 Kim, S. B.; Kim, K.; Leem, S. H.; Lin, S. Y.; Lopez-Berestein, G.; Sood, A. K.; Lee, J. S.  
527 FOXM1 mediates Dox resistance in breast cancer by enhancing DNA repair. *Carcinogenesis*  
528 **2012**, *33* (10), 1843-1853.
- 529 (54) Bergamaschi, A.; Madak-Erdogan, Z.; Kim, Y. J.; Choi, Y. L.; Lu, H.; Katzenellenbogen,  
530 B. S. The forkhead transcription factor FOXM1 promotes endocrine resistance and invasiveness  
531 in estrogen receptor-positive breast cancer by expansion of stem-like cancer cells. *Breast Cancer*  
532 *Res* **2014**, *16* (5), 436.
- 533 (55) Jobard, E.; Pontoizeau, C.; Blaise, B. J.; Bachelot, T.; Elena-Herrmann, B.; Tredan, O. A  
534 serum nuclear magnetic resonance-based metabolomic signature of advanced metastatic human  
535 breast cancer. *Cancer Lett* **2014**, *343* (1), 33-41.
- 536 (56) Arab, A.; Akbarian, S. A.; Ghiyasvand, R.; Miraghajani, M. The effects of conjugated  
537 linoleic acids on breast cancer: A systematic review. *Adv Biomed Res* **2016**, *5*, 115.
- 538 (57) Lessard, M.; Zhao, C.; Singh, S. M.; Poulin, R. Hormonal and feedback regulation of  
539 putrescine and spermidine transport in human breast cancer cells. *J Biol Chem* **1995**, *270* (4),  
540 1685-1694.
- 541 (58) Zhu, Q.; Jin, L.; Casero, R. A.; Davidson, N. E.; Huang, Y. Role of ornithine  
542 decarboxylase in regulation of estrogen receptor alpha expression and growth in human breast  
543 cancer cells. *Breast Cancer Res Treat* **2012**, *136* (1), 57-66.
- 544 (59) Navarro-Tito, N.; Soto-Guzman, A.; Castro-Sanchez, L.; Martinez-Orozco, R.; Salazar,  
545 E. P. Oleic acid promotes migration on MDA-MB-231 breast cancer cells through an arachidonic  
546 acid-dependent pathway. *Int J Biochem Cell Biol* **2010**, *42* (2), 306-317.
- 547 (60) Xia, J. a. W., D.S Using MetaboAnalyst 3.0 for comprehensive metabolomics data  
548 analysis. *Curr. Protoc. Bioinform* **2016**, *55* (14).
- 549 (61) Ching, T.; Zhu, X.; Garmire, L. Cox-nnet: an artificial neural network Cox regression for  
550 prognosis prediction. *bioRxiv* **2016**.
- 551 (62) Chaudhary, K.; Poirion, O. B.; Lu, L.; Garmire, L. X. Deep Learning based multi-omics  
552 integration robustly predicts survival in liver cancer. *Clinical Cancer Research* **2017**.  
553

## 554 **Figure Legends**

555 **Figure 1:** Block diagram of the proposed system. The first step is the preprocessing (log transformation,  
556 centering, autoscaling and quantile normalization). We used Autoencoder pretraining (unsupervised step)

557 to initial model weights and select model architecture. Model used the 80% of data split to train the model  
558 and the remaining 20% to measure model performance. The data was split 10 times to avoid the bias of  
559 data sampling, and the average AUC was calculated on the 10 holds out test samples.

560 **Figure 2: A:** The average AUC on 10 hold out test samples of the DL framework against six machine  
561 learning algorithms for prediction of ER status from metabolomics data: Recursive Partitioning and  
562 Regression Trees (RPART) (0.83), Linear Discriminant Analysis (LDA) (0.74), Support Vector Machine  
563 (SVM)(0.89), DeepLearning (DL)(0.93), Random Forest (RF)(0.89), Generalized Boosted Models  
564 (GBM)(0.89), and Prediction Analysis for Microarrays (PAM)(0.88). The above algorithms were run 10  
565 times on different train/test splits. We used pairwise Wilcoxon signed-rank test to estimate the statistical  
566 significance of the difference in performance between DL and other methods (\*\*  $p < 0.01$ , \*  $p < 0.1$ ). **B:**  
567 Bipartite graph of the top 20 important metabolites extracted from DL model and other machine learning  
568 algorithms. Large nodes represent the models and small nodes are metabolites. A connection between  
569 metabolite and the model means this metabolite is one of the top 20 high importance metabolites extracted  
570 by this model.

571 **Figure 3:** Biological relevance of the DL hidden layers. (A) Activation levels of the high variance nodes  
572 extracted from the layer 1 of the DL model. Columns are samples and rows are the top 12 nodes with high  
573 variance  $> 0.5$ . (B) Bipartite graph of enriched significant metabolomics pathways and top hidden nodes.  
574 The nodes represent enriched pathways common to all top 12 nodes (green color) in the 1<sup>st</sup> hidden layer of  
575 DL in KEGG pathway enrichment analysis (FDR  $< 0.05$ ).

576 **Figure 4:** The joint pathway analysis between the top 20 DL metabolites and the high differentiated  
577 enzymes. Only significant pathways with at least 5 overlapping metabolites are shown. X-axis shows the  
578 number of overlapped metabolites with the number of genes (number in parentheses) involved in the same  
579 pathway, y axis shows the adjusted joint  $P$ -value calculated from IMPALA tool<sup>42</sup>. The size of the nodes  
580 represents the size of metabolomic pathway (number of metabolites involved in that pathway). The color  
581 of the nodes represents the database source of these pathways.

582 **Figure 5:** Circos plot of Spearman correlation values between 20 top DL metabolites and high differentiated  
583 enzymes with cut-off= $|0.35|$ .

584 **Figure 6:** Beta-alanine and ABAT interaction network. (A) Metabolite level of beta-alanine and expression  
585 of ABAT. (B) Beta-alanine-ABAT interaction network in ER<sup>-</sup> breast cancer tissues compared to ER<sup>+</sup>  
586 breast cancer tissues. Metscape, a Cytoscape plug-in, was used to integrate ER<sup>+</sup>/ER<sup>-</sup> metabolomics and  
587 gene expression data (GSE59198) of the same patients. Fold change of metabolites (hexagon nodes) or  
588 enzymes (circle nodes) are represented by the size of the nodes. The input of Metascape are the top 20  
589 metabolites from the DL model and the 898 genes whose expression values are statistically significantly  
590 different between ER<sup>-</sup> and ER<sup>+</sup> samples. Enzymes and metabolites of significant difference are marked by  
591 green line(s) on the shapes.

#### 592 **Supplementary Materials**

593 **Figure S1:** (A) The effect of sample size on the performance of the DL and other machine learning  
594 algorithms.

595 **Figure S2:** The effect of metabolite size on the performance of the DL and other machine learning  
596 algorithms.

597 **Figure S3:** DL 20 top important metabolites. **A.** Heatmap and **B.** Box plot of the 20 top important  
598 metabolites extracted from the DL model.

599 **Figure S4:** Heatmap of the metabolites (columns) which most contribute to the activation value of the top  
600 hidden nodes (rows).

601 **Table S1:** The list of the top 20 important features

602 **Table S2:** Running time of the seven algorithms on the metabolomics dataset

603 **Supplementary file 1:** R code of the preprocessing, models training and testing

604

For TOC only

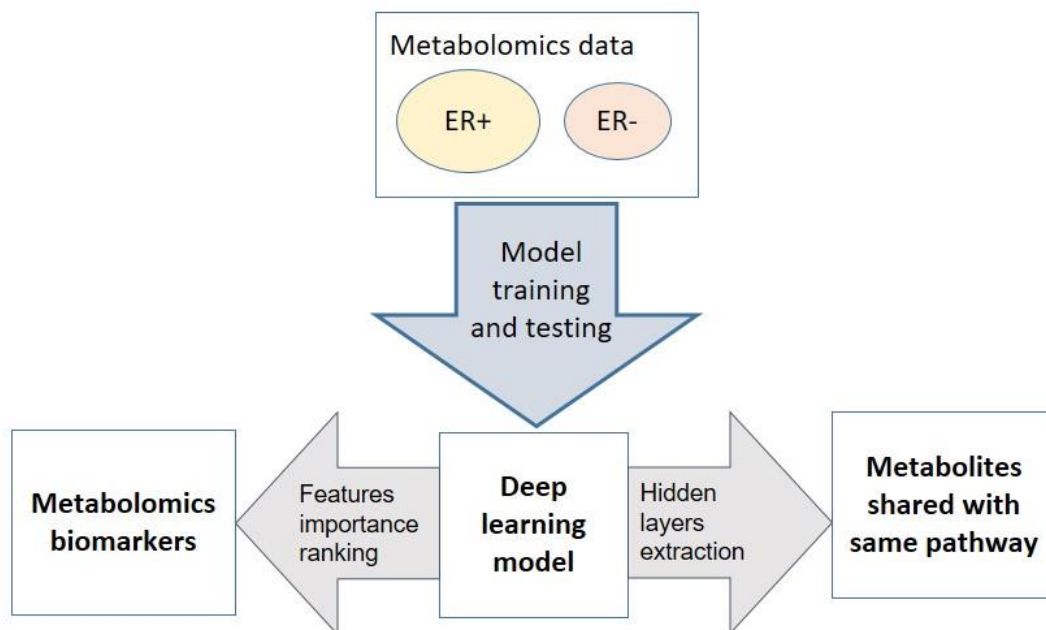

605

606

Figure 1

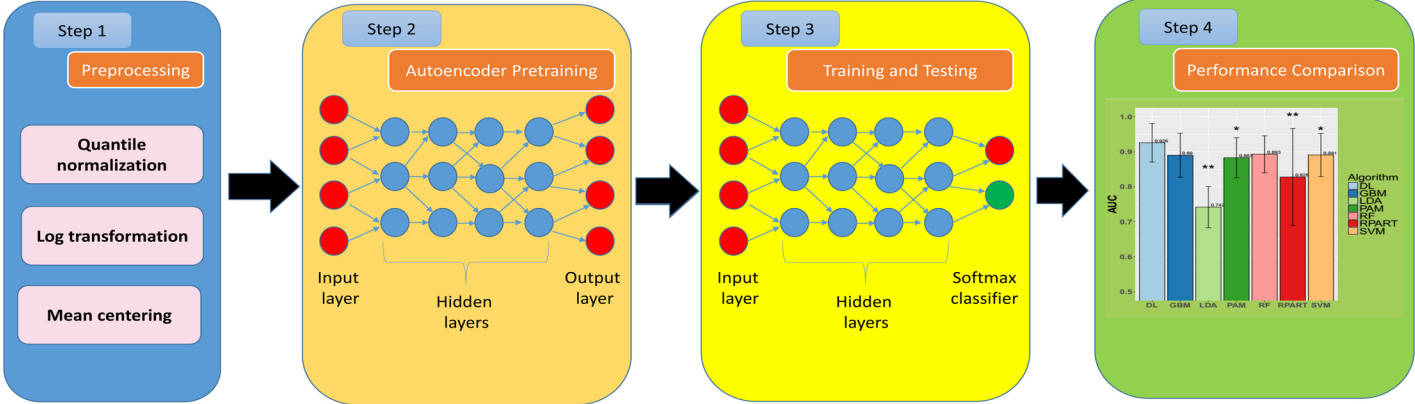



Figure 2

A

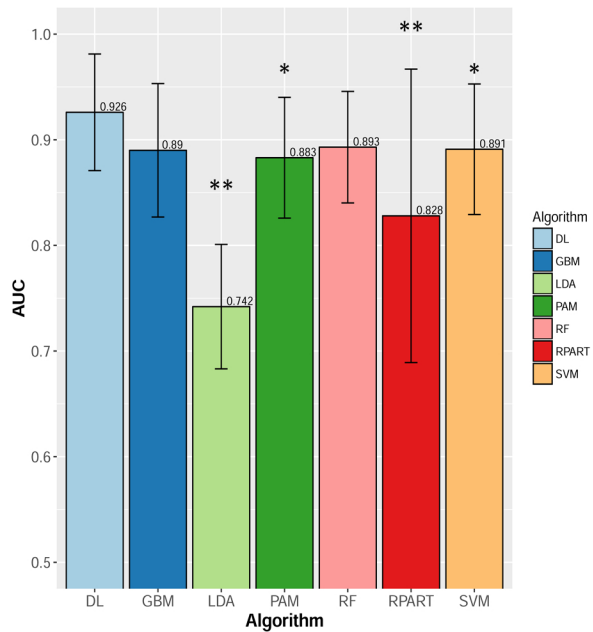

B

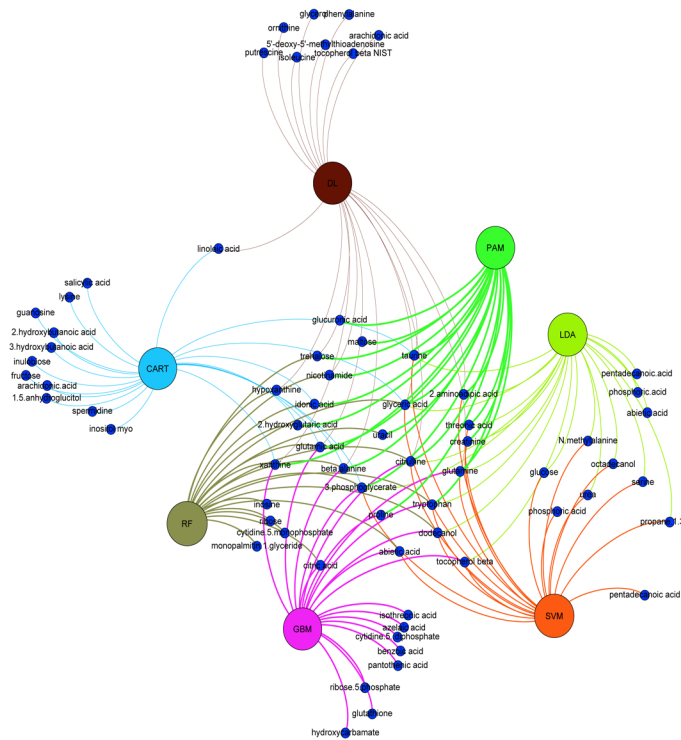

Figure 3

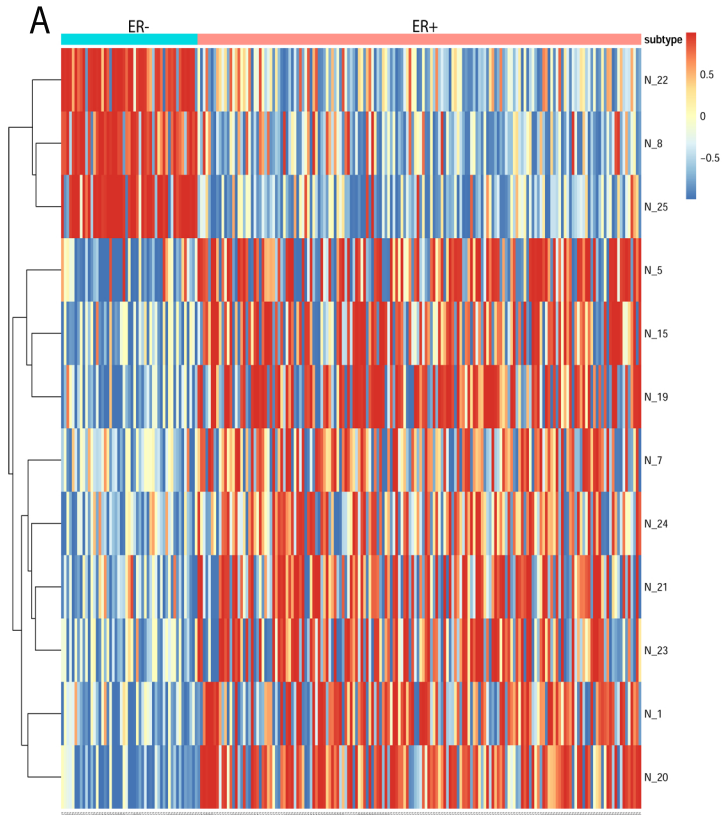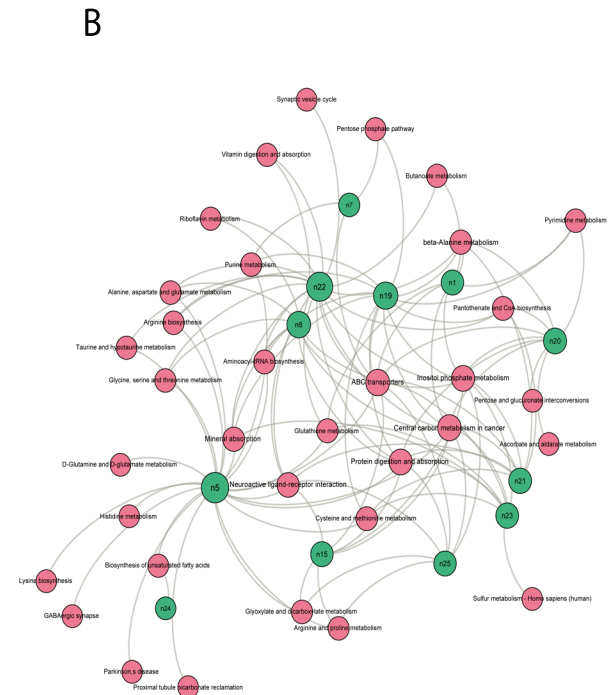

Figure 4

Metabolites–genes overlapping pathways

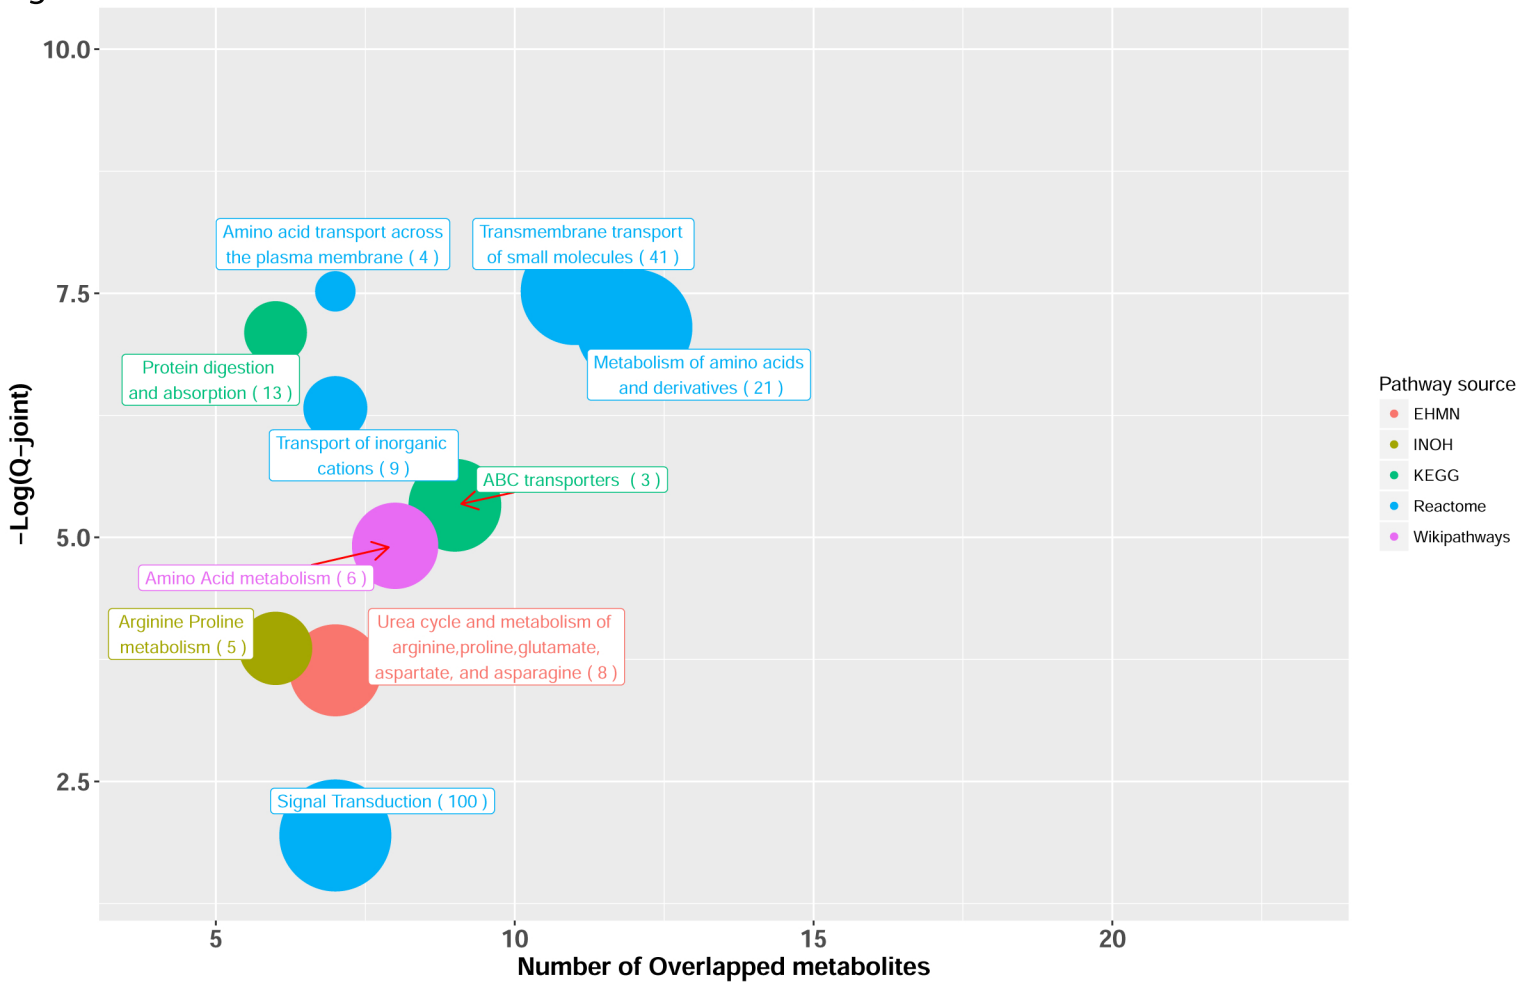

Figure 5

Correlation cut-off  $r=0.35$

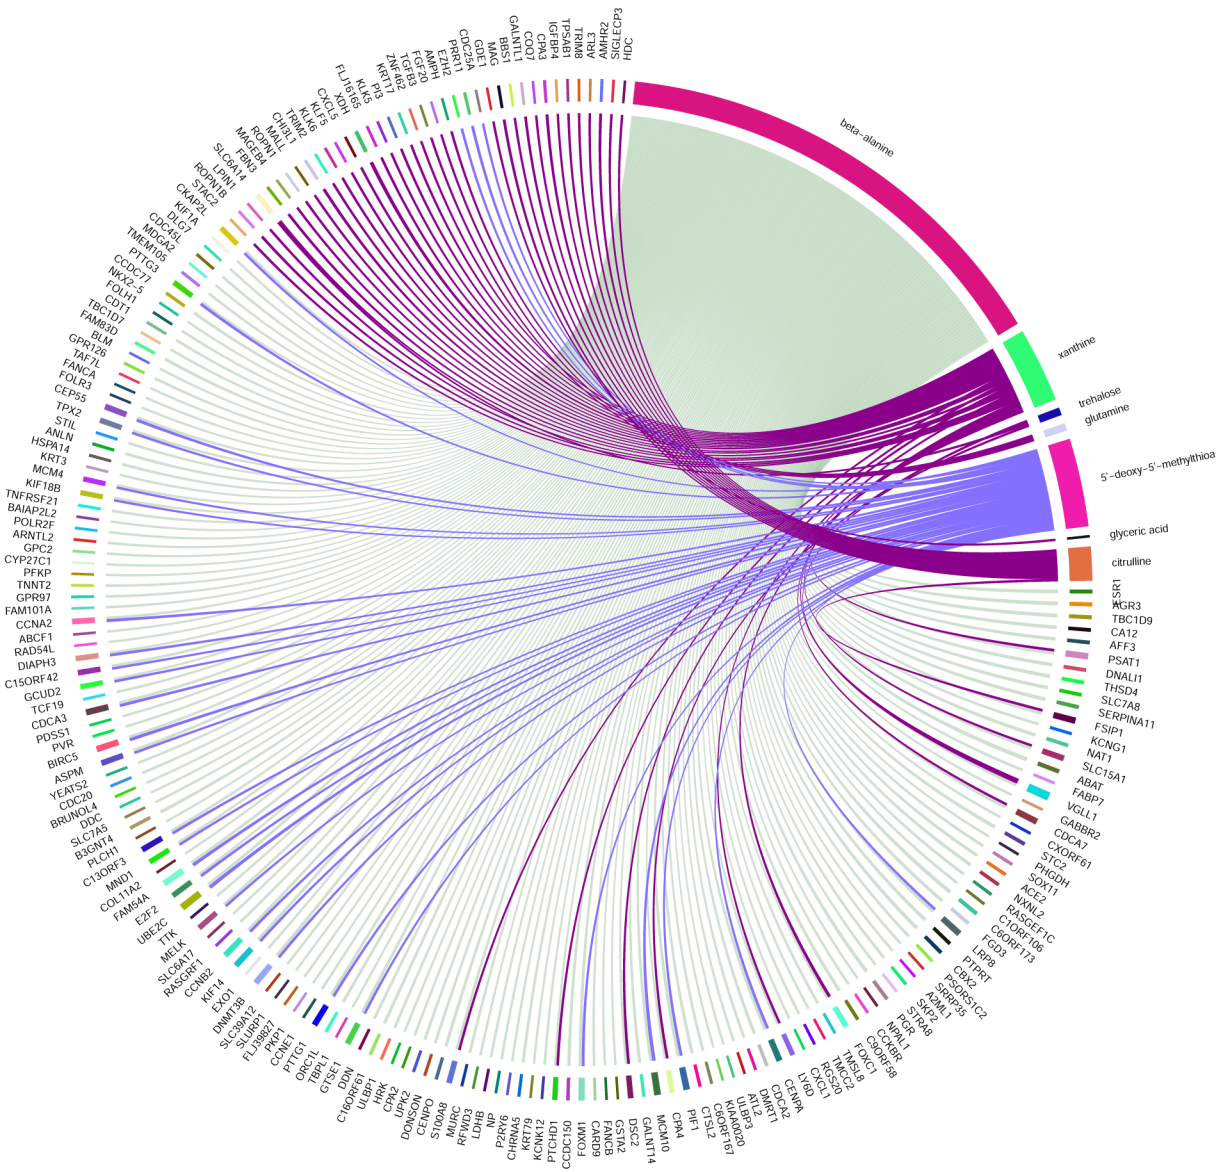

Figure 6

A

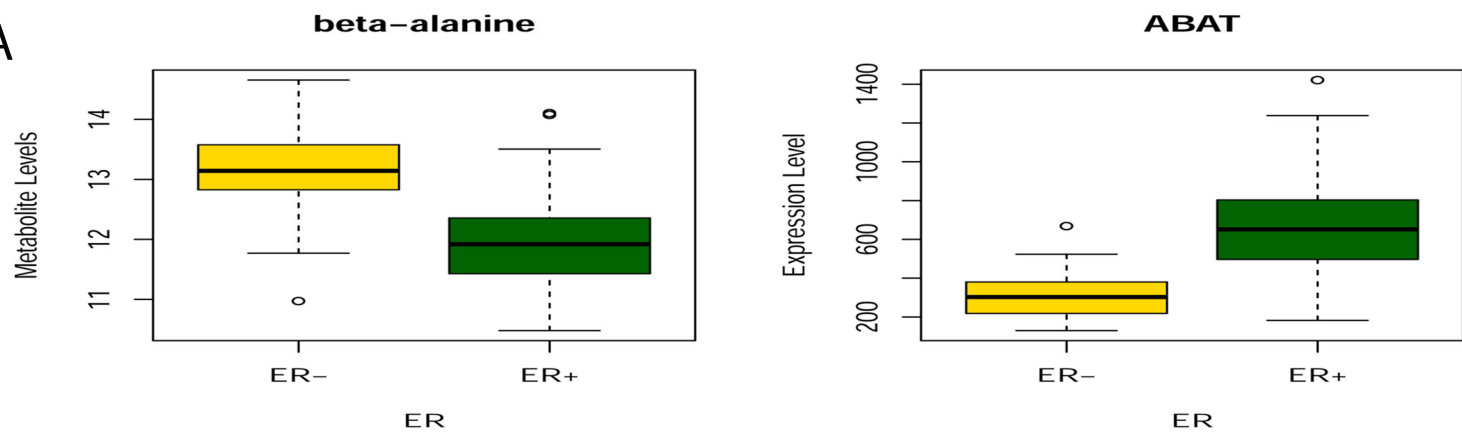

B

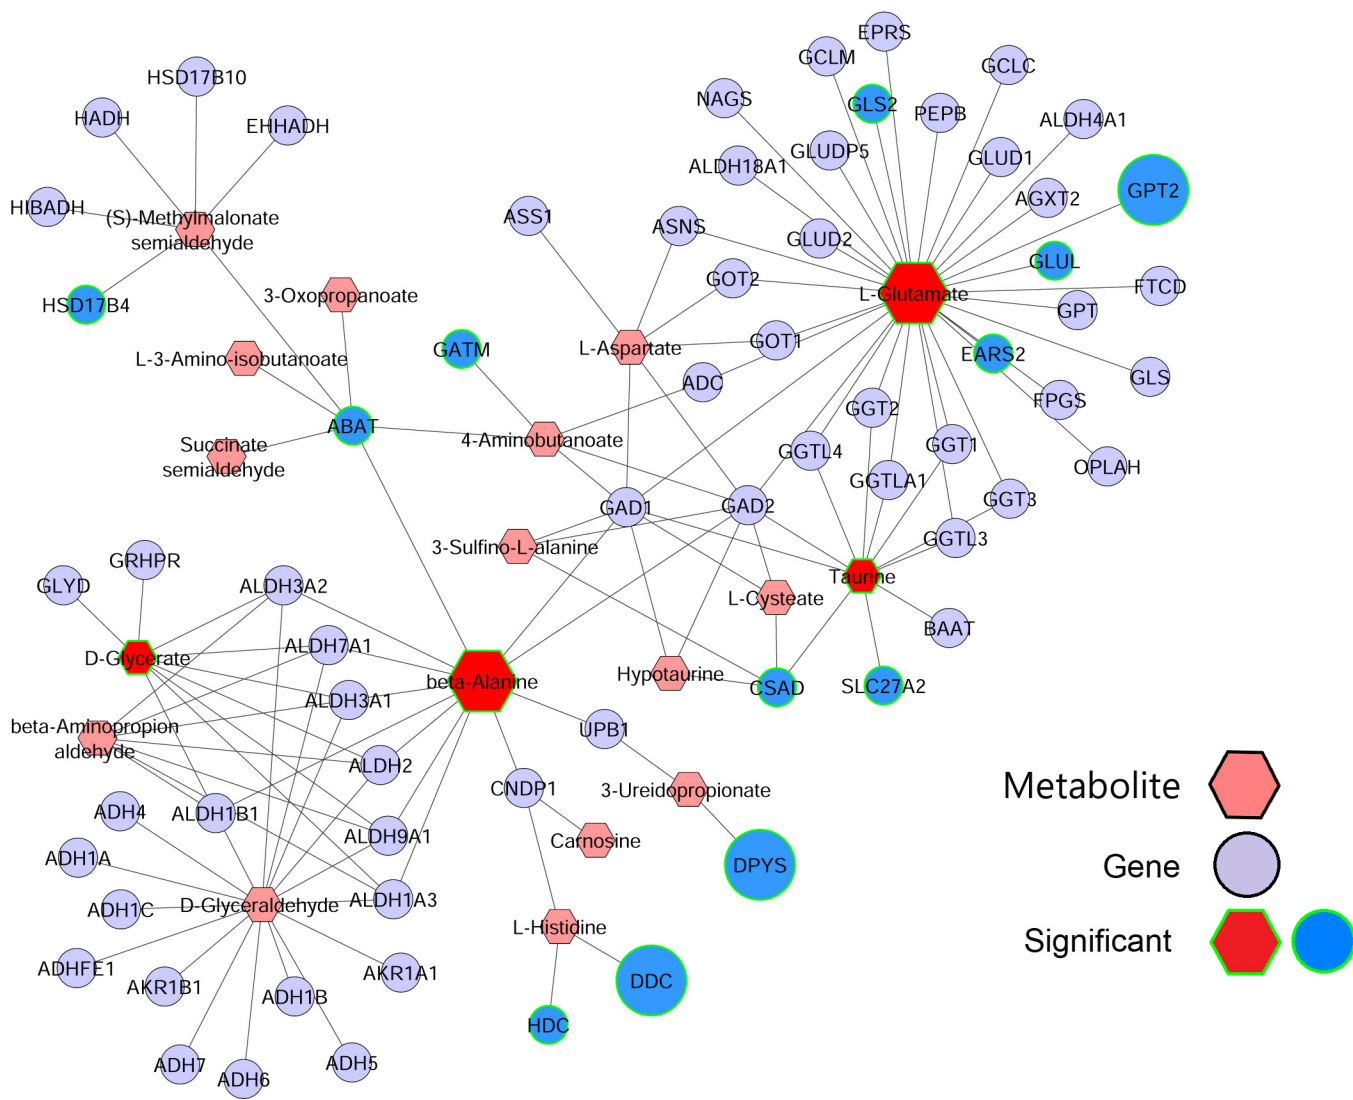

Source: https://www.biorxiv.org/content/10.1101/214254v1.full.pdf
